## 18 **Abstract**

19           We recruited patients with perioperative gastric cancer and examined  
20 preoperative oral hypofunction and its relationship with prognostic nutritional index. This  
21 cross-sectional study analysed 95 patients who underwent oral function management. We  
22 assessed the following parameters: body mass index, stage of gastric cancer, C-reactive  
23 protein, total lymphocyte count, albumin, and prognostic nutritional index. The patients  
24 were divided into two groups: prognostic nutritional index <45 and prognostic nutritional  
25 index >45. Logistic regression analysis was used to assess the association between the  
26 measurements of oral function and the prognostic nutritional index. A univariate analysis  
27 of factors associated with decreased oral function and prognostic nutritional index  
28 showed significant differences in C-reactive protein, neutrophils and tongue pressure  
29 ( $p < 0.01$ ) between the two groups. However, oral hygiene, oral dryness, occlusal force,  
30 tongue-lip motor function, masticatory function, and swallowing function were not  
31 significantly different. Multivariate analysis showed that C-reactive protein (odds ratio:  
32 0.12, 95% confidence interval: 0.30–0.45,  $p < 0.01$ ) and tongue pressure (odds ratio: 3.62,  
33 95% confidence interval: 1.04–12.60,  $p < 0.05$ ) were independent risk factors for oral  
34 hypofunction. Oral function is decreased in perioperative patients with gastric cancer, and  
35 decreased tongue pressure is associated with decreased prognostic nutritional index.

## 36 **Introduction**

37           Nutritional status and systemic inflammatory response in patients with gastric  
38 cancer affect disease recovery, reduce and cause postoperative complications and  
39 hospital mortality [1–3]. Systemic inflammatory responses and malnutrition are caused  
40 by inadequate dietary intake, reduced activity, oxidative stress, increased inflammatory  
41 cytokines, and hormonal imbalances [4,5]. The indicators calculated from the  
42 preoperative blood sampling data are used as an objective method of assessing the  
43 nutritional status [6]. Currently, the prognostic nutritional index (PNI) is considered to be  
44 associated with prognosis in several cancers [3,7–10]. The PNI is calculated from serum  
45 albumin levels and total lymphocyte counts in peripheral blood, and has been proposed  
46 for assessing the perioperative immunonutritional status and surgical risk of patients  
47 scheduled for gastrointestinal surgery. Low PNI may lead to increased postoperative  
48 complications and worsened prognosis [11].

49 Oral function plays a major role in the feeding and swallowing process, and oral  
50 dysfunction worsens the nutritional status [12–14] and is significantly associated with  
51 sarcopenia, low nutrition, and hypotrophy. Decreased oral function decreases the quantity  
52 and quality of food intake, leading to muscle hypotrophy and weight loss, which lead to  
53 a negative cascade of events that promote further progression of hypotrophy and

54 sarcopenia. The individual functions of the parts of the oral cavity work complementarily;  
55 therefore, the decline in oral function is not detected early and progresses gradually.  
56 Therefore, oral hypofunction (OHF) assessment has been proposed to quantitatively  
57 evaluate functional decline, which will lead to early detection of oral hypofunction  
58 [15,16]. The diagnosis of oral hypofunction is based on seven tests, and a diagnosis is  
59 made when the results of three or more of the seven tests are below normal values. The  
60 tests include the assessment of oral moisture, bite force, tongue-lip motor function, tongue  
61 pressure, masticatory function, and swallowing function. Previous studies have associated  
62 poor oral hypofunction with malnutrition, sarcopenia, and frailty [17–20]. However, the  
63 studies were conducted on institutionalised elderly patients, and few studies have  
64 correlated preoperative nutritional status and oral function decline in patients with gastric  
65 cancer. Therefore, we investigated the relationship between the changes in preoperative  
66 oral function and the PNI, an immunonutritional index, in patients with gastric cancer,  
67 since a decline in preoperative oral function may contribute to postoperative  
68 complications. Furthermore, we investigated the correlation between PNI and the seven  
69 factors related to oral hypofunction.

70

## 71 **Materials and Methods**

## 72 **Participants**

73           A cross-sectional analysis of 112 patients diagnosed with primary gastric cancer  
74 who underwent oral functional management at the Nagoya Ekisaikai Hospital from 1  
75 January 2014 to 31 December 2021 was conducted. The inclusion criteria were as  
76 follows: (1) no history of other cancers, (2) histopathologically diagnosed gastric cancer,  
77 (3) no history of radiation therapy and/or chemotherapy, and (4) available preoperative  
78 blood test results. The exclusion criteria included the following: (1) history of oral and  
79 pharyngeal cancer and aborted surgery, (2) patients with gastrointestinal stromal tumours,  
80 (3) recurrence, (4) metabolic diseases (e.g. diabetes), and (5) Sjogren's syndrome; and  
81 (6) 17 patients with missing data. Thus, 95 patients (38 males and 57 females) were  
82 enrolled in the study. Patients' clinical data were recorded using a chart review. No a  
83 priori sample size calculation was required due to the retrospective observational study  
84 design. This research was independently reviewed and approved by the Ethics Committee  
85 of the Nagoya Ekisaikai Hospital (approval number 2021-048). The study was performed  
86 in accordance with the Strengthening the Reporting of Observational Studies in  
87 Epidemiology (STROBE) guidelines and the principles of the Declaration of Helsinki.  
88 The STROBE checklist is shown in Fig 1. The experiments were undertaken with the  
89 understanding and written consent of each subject and according to the above mentioned

90 principles.

91

92 **Fig 1. Flow diagram of exam selection.**

93

## 94 **Evaluation and general status of patients with gastric cancer**

95 Patients with gastric cancer were diagnosed by endoscopy, computed  
96 tomography, and magnetic resonance imaging in the gastrointestinal surgery department  
97 of Nagoya Ekisaikai Hospital. Nutritional status was determined by calculating the body  
98 mass index (BMI), and albumin (ALB), C-reactive protein (CRP), and total lymphocyte  
99 counts were measured by preoperative blood tests. All blood specimens were collected at  
100 least one month prior to the preoperative examination for gastric cancer surgery. The  
101 patients' height and weight were measured during their first visit to our clinic. The PNI  
102 indicates the nutritional status and systemic inflammatory response. The PNI is a simple  
103 scoring system and is calculated based on the serum ALB level and peripheral blood  
104 lymphocyte count [21] by the following formula:  $PNI = [10 \times \text{serum albumin level (g/dL)}]$   
105  $+ 0.005 \times \text{total peripheral lymphocyte count (per mm}^3\text{)]}$ .

106 The PNI is typically quantitative and estimates postoperative surgical  
107 complications in surgical patients, with a PNI >45 indicating surgery, 45–40 indicating

108 caution during surgery, and <40 indicating a contraindication for surgery [22,23].

109

## 110 **Evaluation of oral condition**

111 Oral examinations were performed by two calibrated dentists with more than  
112 seven years of clinical experience. Based on the diagnostic criteria of the Japanese Society  
113 of Geriatric Dentistry, seven sub-symptoms of OHF were measured and evaluated at the  
114 dental outpatient clinic on the day or two days before the surgery. The seven items  
115 include: (1) oral hygiene, (2) oral dryness, (3) occlusal force, (4) tongue-lip motor  
116 function, (5) tongue pressure, (6) masticatory function, and (7) swallowing function.

117 To assess oral hygiene, the degree of tongue coating was visually evaluated by  
118 the tongue coating index (TCI) [24]. The tongue surface was divided into nine sections,  
119 and the degree of tongue coating in each section was rated on a scale of 0 - 2, with 0  
120 indicating the least amount of tongue coating. The total score for all the sections was  
121 calculated as the TCI. A total score of 9 or more was considered poor oral hygiene [16].  
122 The percentage TCI was calculated as the sum of the scores divided by the maximum  
123 score multiplied by 100%. Oral dryness was measured by the wetness of the oral mucosa  
124 using an oral moisture meter (Mucus®, Life Co., Ltd., Saitama, Japan) [25,26]. A  
125 moisture meter reading of <27 was considered as oral dryness. A tongue pressure probe

126 attached to a digital tongue pressure measuring device (JMS Tongue Depressor®, G.C.,  
127 Tokyo, Japan, JMS) was pressed against the tongue and palate with maximum force. A  
128 mean value of <30 kPa was defined as low tongue pressure [14,27]. The participants were  
129 instructed to clench the pressure-sensitive film with their teeth (Dental Prescale II®, G.C.  
130 Co., Ltd., Tokyo, Japan) for 3 s, and the colour change on the pressure-sensitive film was  
131 analysed and converted into occlusal force using the supplied software. A bite force  
132 measurement of <200 N was considered as a decreased bite force [16]. The tongue and  
133 lip movement function was measured by instructing the participants to pronounce the  
134 sounds /pa/, /ta/, and /ka/ as many times as possible in 5 s, and the number of consecutive  
135 pronunciations of /pa/, /ta/, and /ka/ was measured with an oral function measurement  
136 device (Kenkuchi-kun Handy, Takei Kikai Kogyo, Niigata, Japan). For the masticatory  
137 function, the participants chewed 2 g of gummy jelly (Glucoram, G.C., Tokyo, Japan) for  
138 20 s, and the gummy jelly was gargled with 10 mL of water. The chewed gummies and  
139 water were drained through a filtration mesh, and the solution that passed through the  
140 mesh was sampled with an applicator to measure the amount of glucose that eluted with  
141 a chewing ability testing device (Glucosensor GS-II, G.C., Tokyo, Japan). A glucose  
142 density of <100 mg/dL was considered as masticatory dysfunction [28]. Swallowing  
143 function was evaluated using the Swallowing Screening Questionnaire (a 10-item Eating



144 Assessment Tool [EAT-10], 40-point scale); a total score of 3 or more was considered as  
145 a decline in swallowing function [16].

146

## 147 **Data analysis**

148 The normality of the PNI and patient characteristic data were assessed using the  
149 Shapiro–Wilk test. Fisher's exact test was used for normally distributed data, while  
150 Mann–Whitney U test was used for non-normally distributed data. A PNI of 40 or less  
151 was used as the objective variable, and five patient characteristics variables (age, gender,  
152 smoking, alcohol), the number of current teeth, Eichner classification, and the seven  
153 variables that constitute the oral function test were used as explanatory variables in a  
154 logistic regression analysis using the stepwise variable reduction method (Wald;  
155 probability of elimination: 0.10). The Wald test was applied to test the regression  
156 coefficients. The significance level for all statistical analyses was set at 5% on both sides,  
157 and the analyses were conducted by forcibly selecting explanatory variables. All  
158 statistical analyses were performed using EZR (Saitama Medical Center, Jichi Medical  
159 University, Japan) [29].

160

## 161 **Results**

## 162 **Clinical characteristics of the patients**

163           Among the 112 patients with gastric cancer who consented to the study, 95 (38  
164 males and 57 females) were included in the present analysis. The characteristics of the  
165 patients are shown in Table 1. The age of the participants ranged from 37 - 89 years with  
166 a mean age  $\pm$  standard deviation (SD) of  $67.2 \pm 13.2$  years; their BMI ranged from 14.8 -  
167  $43.2 \text{ kg/m}^2$  with a mean  $\pm$  SD of  $22.4 \pm 4.1 \text{ kg/m}^2$ . The number of patients with stage I,  
168 II, III, and IV gastric cancer was 33 (34.7%), 25 (26.3%), 21 (22.1%), and 16 (16.8%),  
169 respectively. No significant between-group differences were found in gender, age, stage  
170 of gastric cancer, or BMI. Patients with PNI  $<45$  (24 patients, 25.3%) were classified into  
171 the low PNI group and those with PNI greater than 45 (71 patients, 74.7%) into the high  
172 PNI group [30].

173

174 **Table 1. Patient background.**

| Characteristics | Group  | Overall         |
|-----------------|--------|-----------------|
| n               |        | 95              |
| Age (years)     |        | $67.2 \pm 13.2$ |
| Sex (%)         | Male   | 38 (40.0)       |
|                 | Female | 57 (60.0)       |
| Smoking (%)     | Yes    | 53 (56.0)       |
|                 | No     | 42 (44.0)       |

|                     |     |              |
|---------------------|-----|--------------|
| Alcohol consumption | Yes | 51 (53.3)    |
| (%)                 |     |              |
|                     | No  | 44 (46.7)    |
| BMI                 |     | 22.4±4.1     |
| Albumin             |     | 3.8±0.7      |
| CRP                 |     | 1.0±1.9      |
| PNI                 |     | 44.9±8.3     |
| WBC                 |     | 6.2±1.9      |
| Neutrophil          |     | 65.2± 9.8    |
| Total lymphocytes   |     | 1490.9±566.2 |
| T (%)               | 1   | 31 (32.6)    |
|                     | 2   | 23 (24.3)    |
|                     | 3   | 27 (28.0)    |
|                     | 4   | 14 (14.7)    |
| N (%)               | 0   | 73 (76.9)    |
|                     | 1   | 14 (14.7)    |
|                     | 2   | 6 ( 6.3)     |
|                     | 3   | 2 ( 2.1)     |
| Stage (%)           | 1   | 33 (34.7)    |
|                     | 2   | 25 (26.3)    |
|                     | 3   | 21 (22.1)    |
|                     | 4   | 16 (16.8)    |
| Residual teeth      |     | 18.8±9.0     |

|                         |            |                  |
|-------------------------|------------|------------------|
| Eichner classification  | A          | 48 (50.5)        |
| (%)                     |            |                  |
|                         | B          | 28 (29.5)        |
|                         | C          | 19 (20.0)        |
| Oral hygiene            |            | 24.6±21.0        |
| Oral dryness            |            | 25.9±4.2         |
| Occlusal force          |            | 396.8±314.3 N    |
| Tongue and lip movement | Yes        | 29 (30.5)        |
| /pa/ta/ka/              |            |                  |
|                         | No         | 66 (69.5)        |
| Tongue pressure         |            | 31.9±11.0 kPa    |
| Masticatory function    |            | 143.5±75.5mg/d L |
| Swallowing function     | No problem | 82 (86.7)        |
|                         | Problem    | 13 (13.7)        |
| Oral hypofunction (%)   | Yes        | 24 (25.3)        |
|                         | No         | 71 (74.7)        |

175 BMI: body mass index; CRP: C-reactive protein; PNI: prognostic nutritional index;  
 176 WBC: white blood cell

177

## 178 Oral function

179 The percentage TCI ranged from 0 - 100% (24.6±21.0%), oral dryness ranged  
 180 from 8.2 - 32.7 (25.9± 4.2), tongue pressure ranged from 6 - 62.1 kPa (31.9 ± 11.0 kPa),

181 and the occlusal force ranged from 44.9 - 1585.6 N ( $396.8 \pm 314.3$  N). The mean value  
182 of tongue and lip movement function was less than 6 times in 66 patients (69.5%).  
183 Decreased masticatory function ranged from 24.0 to 494.0 mg/dL ( $143.5 \pm 75.5$  mg/dL).  
184 The total score for decreased swallowing function was 0 - 14, with 82 patients (86.3%)  
185 having a score of 3 or less and 13 patients (13.7%) having a score of >3 In addition, 24  
186 patients (25.3%) had dysfunction in more than three items of oral function and were  
187 considered to have OHF. We performed univariate analysis of factors related to PNI for  
188 oral dysfunction. The following variables were analysed: age, gender, stage of gastric  
189 cancer, CRP, oral hygiene, oral dryness, tongue pressure, occlusal force, tongue and lip  
190 movement function, masticatory function, and swallowing function. High oral  
191 contamination, such as a TCI of >50%, was observed in four patients in the low PNI  
192 group and 12 patients in the high PNI group. Dry mouth was observed in 10 patients in  
193 the low PNI group and 23 patients in the high PNI group. Low tongue pressure was  
194 observed in 15 patients in the low PNI group and 24 patients in the high PNI group.  
195 Decreased occlusal force was observed in 11 patients in the low PNI group and 19 patients  
196 in the high PNI group. Decreased tongue and lip motor function was found in 18 patients  
197 in the low PNI group and 48 patients in the high PNI group. Masticatory dysfunction was  
198 observed in 11 patients in the low PNI group and 19 patients in the high PNI group.

199 Reduced occlusal force was observed in 11 patients in the low PNI group and 19 patients  
 200 in the high PNI group. Swallowing dysfunction was observed in five patients in the low  
 201 PNI group and eight patients in the high PNI group (Table 2). Univariate analysis showed  
 202 significant differences in CRP, neutrophils and tongue pressure between the two groups  
 203 ( $p < 0.01$ ; Table 3). Multivariate analysis showed that CRP (odds ratio: 0.12, 95%  
 204 confidence interval [CI]: 0.30–0.45,  $p < 0.01$ ) and tongue pressure (odds ratio: 3.62, 95%  
 205 CI: 1.04–12.6,  $p < 0.05$ ) were independent risk factors for PNI (Table 3).

206

207 **Table 2. Univariate analysis.**

| Factor                | Group              | PNI       |                    | p-value |
|-----------------------|--------------------|-----------|--------------------|---------|
|                       |                    | Low (<40) | High ( $\geq 40$ ) |         |
| Sex                   | Male               | 14        | 24                 | 0.103   |
|                       | Female             | 10        | 47                 |         |
| BMI kg/m <sup>2</sup> | Low (<25)          | 16        | 57                 | 0.345   |
|                       | High ( $\geq 25$ ) | 8         | 14                 |         |
| Smoking               | Yes                | 14        | 39                 | 1       |
|                       | No                 | 10        | 32                 |         |
| Alcohol consumption   | Yes                | 10        | 41                 | 0.296   |
|                       | No                 | 14        | 30                 |         |
| Stage                 | $\leq 2$           | 10        | 48                 | 0.059   |

|                        |                     |    |    |        |
|------------------------|---------------------|----|----|--------|
|                        | $\geq 3$            | 14 | 23 |        |
| WBC                    | Low (<)             | 18 | 58 | 0.512  |
|                        | High ( $\geq$ )     | 6  | 13 |        |
| Neutrophil             | Low (<)             | 18 | 66 | 0.041  |
|                        | High ( $\geq$ )     | 6  | 5  |        |
| Total lymphocytes      | Low (<)             | 21 | 51 | 0.133  |
|                        | High ( $\geq$ )     | 3  | 20 |        |
| CRP                    | Low (<5)            | 5  | 51 | >0.001 |
|                        | High ( $\geq 5$ )   | 19 | 20 |        |
| Residual teeth         | <20                 | 14 | 28 | 0.188  |
|                        | $\geq 20$           | 10 | 43 |        |
| Eichner classification | A                   | 8  | 40 | 0.137  |
|                        | B                   | 9  | 19 |        |
|                        | C                   | 8  | 11 |        |
| Oral hygiene           | Good                | 20 | 59 | 1      |
|                        | Poor                | 4  | 12 |        |
| Oral dryness           | Yes                 | 12 | 27 | 0.578  |
|                        | No                  | 17 | 39 |        |
| Occlusal force         | Low (<200)          | 11 | 19 | 0.153  |
|                        | High ( $\geq 200$ ) | 13 | 52 |        |

|                  |            |    |    |       |
|------------------|------------|----|----|-------|
| Tongue-lip motor |            |    |    |       |
| function ODK     | Low (<3)   | 18 | 48 | 0.777 |
|                  | /pa/ta/ka/ |    |    |       |
|                  | High (≥3)  | 6  | 23 |       |
| Tongue pressure  | Low (<30)  | 15 | 24 | 0.033 |
|                  | High (≥30) | 9  | 47 |       |
| Masticatory      | Low (<100  |    |    |       |
| function         | mg/dL)     | 11 | 19 | 0.153 |
|                  | High (≥100 |    |    |       |
|                  | mg/dL)     | 13 | 52 |       |
| Swallowing       |            |    |    |       |
| function         | No problem | 19 | 63 | 0.262 |
|                  | Problem    | 5  | 8  |       |
| Oral             |            |    |    |       |
| hypofunction     | Yes        | 19 | 63 | 0.262 |
|                  | No         | 5  | 8  |       |

208 BMI, body mass index; CRP: C-reactive protein; ODK: oral diadochokinesis; PNI:  
 209 prognostic nutritional index; WBC: white blood cell

210

211

212

213 **Table 3. Multivariate logistic regression: Logistic regression analysis with oral**  
 214 **hypofunction as the objective variable.**

| Factor          | Odds ratio | 95% CI    | p-value |
|-----------------|------------|-----------|---------|
| CRP             | 0.12       | 0.03–0.45 | 0.0015  |
| Tongue pressure | 3.62       | 1.04–12.6 | 0.044   |



215 CRP: C-reactive protein; CI: confidence interval

216

## 217 **Discussion**

218 This cross-sectional study investigated the relationship between PNI and OHF  
219 in preoperative patients with gastric cancer. In such patients, a low PNI is an independent  
220 risk factor for poor prognosis. Consequently, patients with a low preoperative PNI must  
221 be monitored closely after surgery to avoid postoperative complications [3]. Previously,  
222 we reported that lower occlusal support levels are associated with a lower PNI [31,32].  
223 However, the assessment of bite support range only evaluates a part of the complex oral  
224 function, such as swallowing and mastication. Regarding mastication, the risk of low  
225 nutrition and malnutrition can be prevented by devising different food forms and  
226 providing appropriate meals for patients. Therefore, in this study, we evaluated the  
227 general oral function. The results showed that high CRP and low tongue pressure were  
228 associated with a decreased PNI. Decreased tongue pressure was considered to have a  
229 possible influence on low nutrition and hidden sarcopenia. Preoperative serum CRP  
230 increases with cancer progression and is considered a prognostic indicator of cancer  
231 [1,33,34] In the microenvironment, tumour growth stimulates the production of  
232 inflammatory cytokines, such as interleukin-6 (IL-6), interleukin-8 (IL-8), and tumour  
233 necrosis factor (TNF). This is followed by inflammatory response, angiogenesis, and

234 elevated CRP. Inflammatory cytokines, such as TNF- $\alpha$ , IL-1, and IL-6, also induce CRP  
235 production in the liver and cause gradual loss of critical protein components [4,5]. Thus,  
236 high CRP increases the risk of developing cancer, and the PNI is decreased when the CRP  
237 level is high. The preoperative state of nutrition in patients with gastric cancer is  
238 associated with impaired immune system function, delayed wound healing, development  
239 of complications and increased mortality [1–3]. Patients with gastric cancer are often  
240 malnourished due to stomach pain and protein leakage from tumour ulcers [2]. In addition,  
241 poor oral function can lead to loss of appetite and dysphagia, making the patient more  
242 prone to poor nutrition. Preoperative nutritional insufficiency can be caused by a variety  
243 of factors, such as OHF. Although studies have examined the relationship of nutritional  
244 status with the number of teeth loss and masticatory function [35,36], no study has related  
245 preoperative nutritional status in gastrointestinal cancer surgery to comprehensive oral  
246 functions such as swallowing, mastication, and occlusion. A diagnostic criterion  
247 consisting of seven items has been proposed by the Japanese Society of Geriatric  
248 Dentistry as an index to comprehensively evaluate the decline in oral function [16]. If the  
249 value of three of the seven items exceeds the standard value, the patient is diagnosed with  
250 decreased oral function [36]. In this study, 30 patients (40.0%) were diagnosed with  
251 decreased oral function, indicating that many patients with gastric cancer have oral

252 function problems before surgery.

253 Oral functions often require compensatory movements that complement each  
254 other, it is necessary to identify the most influential factors related to oral function. Oral  
255 uncleanliness can lead to an abnormal increase in microorganisms in the oral cavity,  
256 causing pneumonia, postoperative infections, and oral infections. The higher the TCI %,  
257 the higher the number of microorganisms on the tongue. The total anaerobic bacteria  
258 count is about  $7\text{Log}_{10}$  (CFU/mL) when the TCI % is about 50–60% [37]. Poor oral  
259 hygiene of the tongue diminishes the sense of taste and affects the quality of food.  
260 Specifically, poor oral hygiene may affect the intensity of taste, but it is unlikely to be  
261 directly related to nutritional status. No significant difference was found between the two  
262 groups in this study, suggesting that the effect of poor oral hygiene on PNI is small. Oral  
263 dryness alters the homeostasis of the oral environment and induces a variety of disorders.  
264 There were no significant differences in oral dryness and PNI between the groups in this  
265 study. Oral dryness may be caused by unconscious activities such as simultaneous fluid  
266 intake with food intake. Occlusal support, residual tooth count, and muscle strength affect  
267 occlusal strength [38–40]. As the number of teeth decreases, the occlusal force and  
268 masticatory capability decrease. According to many reports, oral function can be  
269 maintained if the number of remaining teeth is  $\geq 20$  and occlusal force is  $\geq 200$  N [41].

270 These reports suggest that a decrease in the number of teeth in patients with gastric cancer  
271 causes an alteration in diet that leads to low nutrition due to impaired gastrointestinal  
272 absorption caused by gastric cancer. In the present study, no association was found  
273 between bite force and PNI. A study reported that low occlusal force (<200 N) is  
274 associated with low body weight as well as obesity [42]. This may be because low bite  
275 strength was calculated based on a study of older people residing in institutions and the  
276 threshold was set at a lower value.

277           Decreased tongue and lip motor function may affect eating behaviour, nutrition,  
278 life function, and quality of life. The value of oral diadochokinesis varies depending on  
279 the condition of the oral cavity such as dentures, individual differences in ageing changes,  
280 underlying diseases, mental status, living environment, nutritional status, and presence of  
281 oral function training [43]. In the present study, no significant association was found  
282 between oral diadochokinesis and PNI. The reason may be that the frailty in patients for  
283 whom surgery had been indicated had not progressed. As surgical indications are  
284 expanded with the improvement of surgical and anaesthesia techniques, some frail  
285 patients with gastric cancer may be encountered; therefore, the effectiveness of screening  
286 needs to be additionally examined. Decreased tongue pressure due to chronic dysfunction  
287 of the lingual muscle groups decreases the pressure created between the tongue, palate,

288 and food. The tongue performs complex mastication, swallowing, and phonation  
289 movements in coordination with the lips, mandible, pharynx, and larynx. These are  
290 important functions for maintaining life and quality of life but are difficult to quantify  
291 due to the complexity of the movements. The tongue pressure test is one of the few  
292 methods that can quantify the tongue strength. Previous studies have shown that tongue  
293 pressure is positively correlated with the food intake rate and that individuals with a  
294 maximised tongue pressure of  $\geq 30$  kPa can consume regular food, while individuals with  
295 a low tongue pressure have significantly lower food intake rate and eating patterns  
296 [14,27,44]. The results of our study showed that tongue pressure was an independent risk  
297 factor for PNI. When there is poor occlusion, it is assumed that the patient eats a soft diet  
298 and swallows by crushing the food with the tongue, jaw crest, and palate. Therefore, with  
299 appropriate tongue pressure, the compensatory mechanisms of oral function would work  
300 effectively, and the PNI would not decrease. In contrast, with low tongue pressure, the  
301 tongue cannot press against the jaw crest and palate, and compensatory movements are  
302 not possible, leading to a low PNI. Therefore, low tongue pressure is a risk factor for  
303 dysphagia and low nutrition and may also affect eating patterns, assessment and  
304 interventions such as appropriate and adequate exercise therapy, and therapeutic  
305 intervention such as improvement of oral morphology with prosthetic devices (e.g. tongue

306 contact assisted floor), which are important for the prevention of low nutrition and muscle  
307 weakness. Dysphagia precedes the onset of obvious disability. In the absence of a  
308 causative disease, some cases of dysphagia are not recognised as diseases and do not  
309 warrant medical attention, and many symptoms, such as mild pharyngeal discomfort and  
310 swelling, occur in the older population. Therefore, the presence of hypophagia is a  
311 criterion for evaluating dysfunctional states prior to the onset of obvious disability. This  
312 reflects the patient's perception, but there was no significant difference between the two  
313 PNI groups, which suggests that few patients eligible for surgery have significant  
314 functional decline.

315         Several limitations exist in this study. The present study was a single-centre  
316 study with a retrospective design, and had a small sample size. Selection bias exists  
317 because this is an observational study of surgical patients. Nutritional status is influenced  
318 by several factors, including oral findings, smoking history, psychiatric and psychological  
319 status, socioeconomic status, performance of daily activities, level of education,  
320 prevalence of processed food intake, and cultural differences in diet among countries. All  
321 of these factors were not investigated in this study. In addition, as the present study was  
322 a single-centre cross-sectional study, it was not feasible to establish a causal relationship  
323 from the findings obtained. PNI is formulated on the basis of albumin levels and

324 lymphocyte counts. Therefore, caution should be exercised when interpreting results from  
325 patients with preoperative chemotherapy or severe inflammatory or autoimmune disease.

326           When the diagnostic criteria for OHF are considered as a screening stage before  
327 functional impairment and malnutrition occur, it is possible to detect and respond early  
328 to the transition from OHF to malnutrition and to the flail cycle in the dental field. This  
329 early response can only be achieved through cooperation among multiple physicians and  
330 through cooperation among nurses, pharmacists, nutritionists, dental hygienists, and  
331 linguists, which will increase the contribution of dentistry to cooperation with  
332 multidisciplinary physicians and multidisciplinary professionals such as nurses,  
333 pharmacists, nutritionists, dental hygienists, speech therapists, and physical therapists.

334

## 335 **Acknowledgements**

336 We would like to thank Editage ([www.editage.com](http://www.editage.com)) for English language editing.

337

## 338 **References**

339 1. Elahi MM, McMillan DC, McArdle CS, Angerson WJ, Sattar N. Score based on  
340 hypoalbuminemia and elevated C-reactive protein predicts survival in patients with  
341 advanced gastrointestinal cancer. *Nutr Cancer*. 2004;48: 171–173. doi:

342 [10.1207/s15327914nc4802\\_6](https://doi.org/10.1207/s15327914nc4802_6).

343 2. Kushiyama S, Sakurai K, Kubo N, Tamamori Y, Nishii T, Tachimori A, et al.  
344 The preoperative geriatric nutritional risk index predicts postoperative complications in  
345 elderly patients with gastric cancer undergoing gastrectomy. *In Vivo*. 2018;32:  
346 1667–1672. doi: [10.21873/invivo.11430](https://doi.org/10.21873/invivo.11430).

347 3. Xishan Z, Ye Z, Feiyan M, Liang X, Shikai W. The role of prognostic nutritional  
348 index for clinical outcomes of gastric cancer after total gastrectomy. *Sci Rep*. 2020;10:  
349 17373. doi: [10.1038/s41598-020-74525-8](https://doi.org/10.1038/s41598-020-74525-8).

350 4. Diakos CI, Charles KA, McMillan DC, Clarke SJ. Cancer-related inflammation  
351 and treatment effectiveness. *Lancet Oncol*. 2014;15: e493–e503. doi: [10.1016/S1470-](https://doi.org/10.1016/S1470-2045(14)70263-3)  
352 [2045\(14\)70263-3](https://doi.org/10.1016/S1470-2045(14)70263-3).

353 5. Roxburgh CS, McMillan DC. Cancer and systemic inflammation: Treat the  
354 tumour and treat the host. *Br J Cancer*. 2014;110: 1409–1412. doi: [10.1038/bjc.2014.90](https://doi.org/10.1038/bjc.2014.90).

355 6. Guner A, Kim HI. Biomarkers for evaluating the inflammation status in patients  
356 with cancer. *J Gastric Cancer*. 2019;19: 254–277. doi: [10.5230/jgc.2019.19.e29](https://doi.org/10.5230/jgc.2019.19.e29).

357 7. Fanetti G, Polesel J, Fratta E, Muraro E, Lupato V, Alfieri S, et al. Prognostic  
358 nutritional index predicts toxicity in head and neck cancer patients treated with definitive  
359 radiotherapy in association with chemotherapy. *Nutrients*. 2021;13: 127. doi:



360 [10.3390/nu13041277](https://doi.org/10.3390/nu13041277).

361 8. Toyokawa G, Kozuma Y, Matsubara T, Haratake N, Takamori S, Akamine T, et  
362 al. Prognostic impact of controlling nutritional status score in resected lung squamous cell  
363 carcinoma. *J Thorac Dis.* 2017;9: 2942–2951. doi: [10.21037/jtd.2017.07.108](https://doi.org/10.21037/jtd.2017.07.108).

364 9. Wu X, Jiang Y, Ge H, Diao P, Wang D, Wang Y, et al. Predictive value of  
365 prognostic nutritional index in patients with oral squamous cell carcinoma. *Oral Dis.*  
366 2020;26: 903–911. doi: [10.1111/odi.13318](https://doi.org/10.1111/odi.13318).

367 10. Xue Y, Zhou X, Xue L, Zhou R, Luo J. The role of pretreatment prognostic  
368 nutritional index in esophageal cancer: A meta-analysis. *J Cell Physiol.* 2019;234:  
369 19655–19662. doi: [10.1002/jcp.28565](https://doi.org/10.1002/jcp.28565).

370 11. Jiang N, Deng JY, Ding XW, Ke B, Liu N, Zhang RP, et al. Prognostic  
371 nutritional index predicts postoperative complications and long-term outcomes of gastric  
372 cancer. *World J Gastroenterol.* 2014;20: 10537–10544. doi: [10.3748/wjg.v20.i30.10537](https://doi.org/10.3748/wjg.v20.i30.10537).

373 12. de Marchi RJ, Hugo FN, Hilgert JB, Padilha DMP. Association between oral  
374 health status and nutritional status in south Brazilian independent-living older people.  
375 *Nutrition.* 2008;24: 546–553. doi: [10.1016/j.nut.2008.01.054](https://doi.org/10.1016/j.nut.2008.01.054).

376 13. Soini H, Muurinen S, Routasalo P, Sandelin E, Savikko N, Suominen M, et al.  
377 Oral and nutritional status-is the MNA a useful tool for dental clinics. *J Nutr Health Aging.*

378 2006;10: 495–499; discussion 500.

379 14. Yoshida M, Kikutani T, Tsuga K, Utanohara Y, Hayashi R, Akagawa Y.

380 Decreased tongue pressure reflects symptom of dysphagia. *Dysphagia*. 2006;21: 61–65.

381 doi: [10.1007/s00455-005-9011-6](https://doi.org/10.1007/s00455-005-9011-6).

382 15. Hatanaka Y, Furuya J, Sato Y, Uchida Y, Shichita T, Kitagawa N, et al.

383 Associations between oral hypofunction tests, age, and sex. *Int J Environ Res Public*

384 *Health*. 2021;18: 10256. doi: [10.3390/ijerph181910256](https://doi.org/10.3390/ijerph181910256).

385 16. Minakuchi S, Tsuga K, Ikebe K, Ueda T, Tamura F, Nagao K, et al. Oral

386 hypofunction in the older population: Position paper of the Japanese Society of

387 Gerodontology in 2016. *Gerodontology*. 2018;35: 317–324. doi: [10.1111/ger.12347](https://doi.org/10.1111/ger.12347).

388 17. Iwasaki M, Motokawa K, Watanabe Y, Shirobe M, Ohara Y, Edahiro A, et al.

389 Oral hypofunction and malnutrition among community-dwelling older adults: Evidence

390 from the Otassha study. *Gerodontology*. 2022;39: 17–25. doi: [10.1111/ger.12580](https://doi.org/10.1111/ger.12580).

391 18. Kugimiya Y, Iwasaki M, Ohara Y, Motokawa K, Edahiro A, Shirobe M, et al.

392 Relationship between oral hypofunction and sarcopenia in community-dwelling older

393 adults: The Otassha study. *Int J Environ Res Public Health*. 2021;18: 6666. doi:

394 [10.3390/ijerph18126666](https://doi.org/10.3390/ijerph18126666).

395 19. Nakamura M, Hamada T, Tanaka A, Nishi K, Kume K, Goto Y, et al.

- 396 Association of oral hypofunction with frailty, sarcopenia, and mild cognitive impairment:  
397 A cross-sectional study of community-dwelling Japanese older adults. *J Clin Med*.  
398 2021;10: 1626. doi: [10.3390/jcm10081626](https://doi.org/10.3390/jcm10081626).
- 399 20. Shimazaki Y, Nonoyama T, Tsushita K, Arai H, Matsushita K, Uchibori N. Oral  
400 hypofunction and its association with frailty in community-dwelling older people. *Geriatr*  
401 *Gerontol Int*. 2020;20: 917–926. doi: [10.1111/ggi.14015](https://doi.org/10.1111/ggi.14015).
- 402 21. Pinato DJ, North BV, Sharma R. A novel, externally validated inflammation-  
403 based prognostic algorithm in hepatocellular carcinoma: The prognostic nutritional index  
404 (PNI). *Br J Cancer*. 2012;106: 1439–1445. doi: [10.1038/bjc.2012.92](https://doi.org/10.1038/bjc.2012.92).
- 405 22. Buzby GP, Mullen JL, Matthews DC, Hobbs CL, Rosato EF. Prognostic  
406 nutritional index in gastrointestinal surgery. *Am J Surg*. 1980;139: 160–167. doi:  
407 [10.1016/0002-9610\(80\)90246-9](https://doi.org/10.1016/0002-9610(80)90246-9).
- 408 23. Onodera T, Goseki N, Kosaki G. Prognostic nutritional index in gastrointestinal  
409 surgery of malnourished cancer patients. *Nihon Geka Gakkai Zasshi*. 1984;85: 1001–  
410 1005. (in Japanese).
- 411 24. Shimizu T, Ueda T, Sakurai K. New method for evaluation of tongue-coating  
412 status. *J Oral Rehabil*. 2007;34: 442–447. doi: [10.1111/j.1365-2842.2007.01733.x](https://doi.org/10.1111/j.1365-2842.2007.01733.x).
- 413 25. Fukushima Y, Yoda T, Kokabu S, Araki R, Murata T, Kitagawa Y, et al.

- 414 Evaluation of an oral moisture-checking device for screening dry mouth. *Open Journal*  
415 *of Stomatology*. 2013;3: 440–446. doi: [10.1002/cre2.145](https://doi.org/10.1002/cre2.145).
- 416 26. Yamada H, Nakagawa Y, Nomura Y, Yamamoto K, Suzuki M, Watanabe NY,  
417 et al. Preliminary results of moisture checker for Mucus in diagnosing dry mouth. *Oral*  
418 *Dis*. 2005;11: 405–407. doi: [10.1111/j.1601-0825.2005.01136.x](https://doi.org/10.1111/j.1601-0825.2005.01136.x).
- 419 27. Tsuga K, Yoshikawa M, Oue H, Okazaki Y, Tsuchioka H, Maruyama M, et al.  
420 Maximal voluntary tongue pressure is decreased in Japanese frail elderly persons.  
421 *Gerodontology*. 2012;29: e1078–e1085–e1085. doi: [10.1111/j.1741-2358.2011.00615.x](https://doi.org/10.1111/j.1741-2358.2011.00615.x).
- 422 28. Deftereos I, Kiss N, Isenring E, Carter VM, Yeung JM. A systematic review of  
423 the effect of preoperative nutrition support on nutritional status and treatment outcomes  
424 in upper gastrointestinal cancer resection. *Eur J Surg Oncol*. 2020;46: 1423–1434. doi:  
425 [10.1016/j.ejso.2020.04.008](https://doi.org/10.1016/j.ejso.2020.04.008).
- 426 29. Kanda Y. Investigation of the freely available easy-to-use software 'EZR' for  
427 medical statistics. *Bone Marrow Transplant*. 2013;48: 452–458. doi:  
428 [10.1038/bmt.2012.244](https://doi.org/10.1038/bmt.2012.244).
- 429 30. Yang Y, Gao P, Song Y, Sun J, Chen X, Zhao J, et al. The prognostic nutritional  
430 index is a predictive indicator of prognosis and postoperative complications in gastric  
431 cancer: A meta-analysis. *Eur J Surg Oncol*. 2016;42: 1176–1182. doi:

432 [10.1016/j.ejso.2016.05.029](https://doi.org/10.1016/j.ejso.2016.05.029).

433 31. Abe A, Kurita K, Hayashi H, Ishihama T, Ueda A. Correlation between  
434 prognostic nutritional index and occlusal status in gastric cancer. *Oral Dis.* 2020;26: 465–  
435 472. doi: [10.1111/odi.13242](https://doi.org/10.1111/odi.13242).

436 32. Abe A, Ito Y, Hayashi H, Ishihama T, Momokita M, Taniguchi S. Correlation  
437 between geriatric nutritional risk index and oral condition in gastric cancer patients. *Oral*  
438 *Dis.* 2021. doi: [10.1111/odi.14035](https://doi.org/10.1111/odi.14035).

439 33. Erlinger TP, Platz EA, Rifai N, Helzlsouer KJ. C-reactive protein and the risk of  
440 incident colorectal cancer. *JAMA.* 2004;291: 585–590. doi: [10.1001/jama.291.5.585](https://doi.org/10.1001/jama.291.5.585).

441 34. Kinoshita A, Onoda H, Imai N, Iwaku A, Oishi M, Fushiya N, et al. Comparison  
442 of the prognostic value of inflammation-based prognostic scores in patients with  
443 hepatocellular carcinoma. *Br J Cancer.* 2012;107: 988–993. doi: [10.1038/bjc.2012.354](https://doi.org/10.1038/bjc.2012.354).

444 35. Hakeem FF, Bernabé E, Sabbah W. Association between oral health and frailty:  
445 A systematic review of longitudinal studies. *Gerodontology.* 2019;36: 205–215. doi:  
446 [10.1111/ger.12406](https://doi.org/10.1111/ger.12406).

447 36. Iwasaki M, Hirano H, Ohara Y, Motokawa K. The association of oral function  
448 with dietary intake and nutritional status among older adults: Latest evidence from  
449 epidemiological studies. *Jpn Dent Sci Rev.* 2021;57: 128–137. doi:

450 [10.1016/j.jdsr.2021.07.002](https://doi.org/10.1016/j.jdsr.2021.07.002).

451 37. Iyota K, Mizutani S, Oku S, Asao M, Futatsuki T, Inoue R, et al. A cross-  
452 sectional study of age-related changes in oral function in healthy Japanese individuals.  
453 Int J Environ Res Public Health. 2020;17: 1376. doi: [10.3390/ijerph17041376](https://doi.org/10.3390/ijerph17041376).

454 38. Iinuma T, Arai Y, Fukumoto M, Takayama M, Abe Y, Asakura K, et al.  
455 Maximum occlusal force and physical performance in the oldest old: The Tokyo oldest  
456 old survey on total health. J Am Geriatr Soc. 2012;60: 68–76. doi: [10.1111/j.1532-  
457 5415.2011.03780.x](https://doi.org/10.1111/j.1532-5415.2011.03780.x).

458 39. Ikebe K, Matsuda K, Murai S, Maeda Y, Nokubi T. Validation of the Eichner  
459 index in relation to occlusal force and masticatory performance. Int J Prosthodont.  
460 2010;23: 521–524.

461 40. Inomata C, Ikebe K, Kagawa R, Okubo H, Sasaki S, Okada T, et al. Significance  
462 of occlusal force for dietary fibre and vitamin intakes in independently living 70-year-old  
463 Japanese: From SONIC Study. J Dent. 2014;42: 556–564. doi:  
464 [10.1016/j.jdent.2014.02.015](https://doi.org/10.1016/j.jdent.2014.02.015).

465 41. de Andrade FB, Lebrão ML, Santos JL, Duarte YA. Relationship between oral  
466 health and frailty in community-dwelling elderly individuals in Brazil. J Am Geriatr Soc.  
467 2013;61: 809–814. doi: [10.1111/jgs.12221](https://doi.org/10.1111/jgs.12221).

- 468 42. Ikebe K, Matsuda K, Morii K, Nokubi T, Ettinger RL. The relationship between  
469 oral function and body mass index among independently living older Japanese people. *Int*  
470 *J Prosthodont.* 2006;19: 539–546.
- 471 43. Umemoto G, Tsuboi Y, Kitashima A, Furuya H, Kikuta T. Impaired food  
472 transportation in Parkinson’s disease related to lingual bradykinesia. *Dysphagia.* 2011;26:  
473 250–255. doi: [10.1007/s00455-010-9296-y](https://doi.org/10.1007/s00455-010-9296-y).
- 474 44. Utanohara Y, Hayashi R, Yoshikawa M, Yoshida M, Tsuga K, Akagawa Y.  
475 Standard values of maximum tongue pressure taken using newly developed disposable  
476 tongue pressure measurement device. *Dysphagia.* 2008;23: 286–290. doi:  
477 [10.1007/s00455-007-9142-z](https://doi.org/10.1007/s00455-007-9142-z).

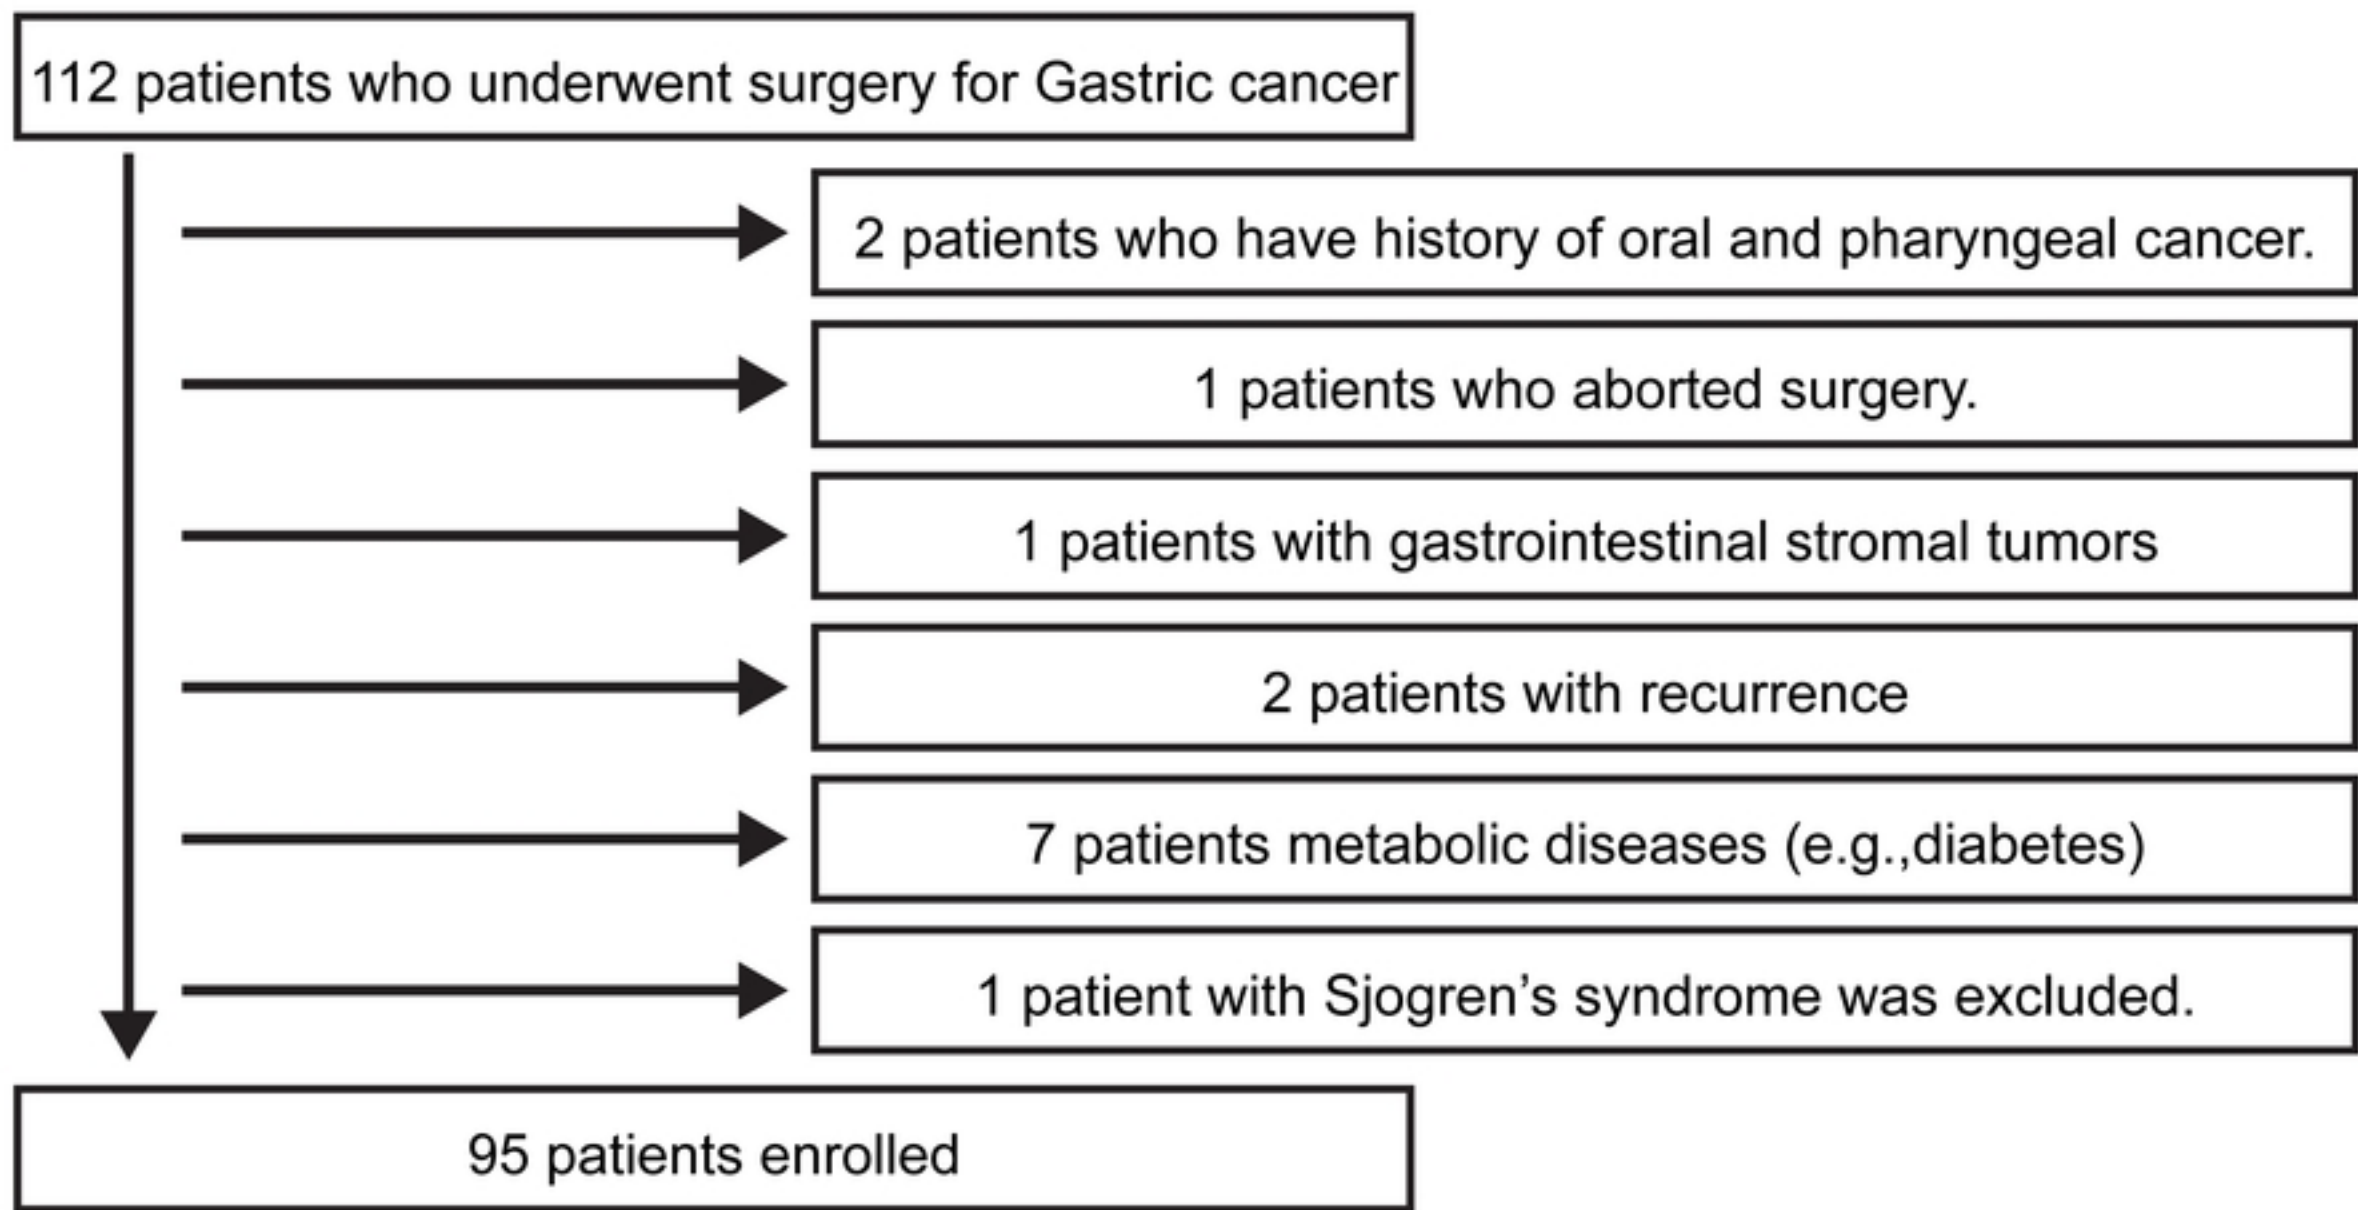

Figure 1
